# Supplementary material
Source: PubMed Central journal article supplement (PMC3540945)
Supplement: neo1412_1203SD1.pdf [file neo1412_1203SD1.pdf]

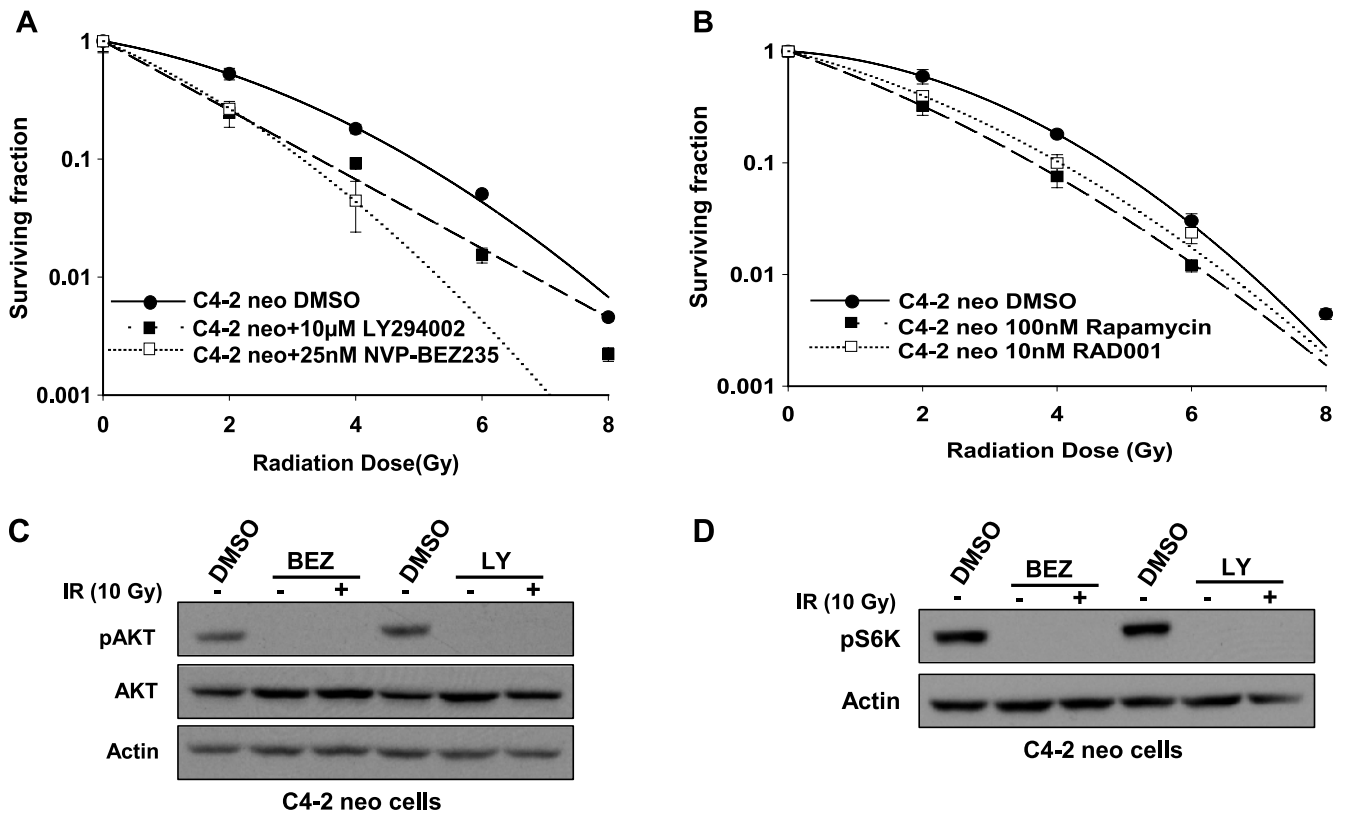

**Figure W1.** PI3K-AKT and PI3K-mTOR inhibitors increase the radiosensitivity in DAB2IP-negative PCa cell line. (A) The SF analysis of C4-2 neo cells after combined treatment with 10  $\mu$ M LY294002 and IR or 25 nM NVP-BE235 and IR. (B) SF analysis of C4-2 neo cells after combined treatment with 100 nM rapamycin and IR or 10 nM RAD001. (C) C4-2 neo cells were irradiated (10 Gy) after 1 hour of 10  $\mu$ M LY294002 or 25 nM NVP-BE235 treatment and harvested at 1 hour after IR. Inhibition of PI3K-Akt pathway was analyzed by Western blot analysis with phospho-Akt (Ser<sup>473</sup>) antibody. (D) C4-2 neo cells were irradiated (10 Gy) after 1 hour of 100 nM rapamycin or 10 nM RAD001 treatment and harvested at 1 hour after IR. Inhibition of mTOR pathway was analyzed by Western blot analysis with phospho-S6K antibody.
